# Supplementary material
Source: PubMed Central journal article supplement (PMC4439519)
Supplement: supp_bts524_Supplementary.pdf [file supp_bts524_Supplementary.pdf]

# Supplementary materials

## 1 Second sequencing run demultiplexing results

Table 1: Number of demultiplexed reads depending on plate region. We report number of SSR containing loci assembled with HighSSR program for SSRs with consensus size 2-6 nt. In the second sequencing run samples have been multiplexed with standard MIDs described in Roche TCB No. 005-2009 technical bulletin.

| Accession # | Taxa                                | MID    | Region | SSR reads | non-SSR reads | Total reads | Loci |
|-------------|-------------------------------------|--------|--------|-----------|---------------|-------------|------|
| 5.91        | <i>Leucaena lempirana</i>           | MID-01 | 1      | 4,683     | 2,499         | 7,182       | 174  |
| 19.84       | <i>Leucaena magnifica</i>           | MID-02 | 1      | 4,807     | 2,057         | 6,864       | 75   |
| 61.88       | <i>Leucaena trichodes</i>           | MID-03 | 1      | 3,129     | 1,882         | 5,011       | 79   |
| 135.92      | <i>Leucaena shannoni</i>            | MID-04 | 1      | 5,030     | 2,102         | 7,132       | 162  |
| 81.87       | <i>Leucaena multicapitula</i>       | MID-05 | 1      | 2,713     | 2,023         | 4,736       | 112  |
| 17.86       | <i>Leucaena salvadorensis</i>       | MID-06 | 1      | 2,995     | 1,552         | 4,547       | 58   |
| 134.92      | <i>Leucaena lanceolata</i>          | MID-07 | 1      | 5,877     | 3,023         | 8,900       | 179  |
| 128.92      | <i>Leucaena trichandra</i>          | MID-08 | 1      | 4,018     | 2,019         | 6,037       | 62   |
| 18.84       | <i>Leucaena collinsii zac</i>       | MID-10 | 1      | 2,231     | 1,804         | 4,036       | 47   |
| 55.88       | <i>Leucaena macrophylla</i>         | MID-11 | 1      | 2,304     | 2,132         | 4,436       | 80   |
| 90.92       | <i>Leucaena lanceolata</i>          | MID-13 | 1      | 2,046     | 2,272         | 4,318       | 83   |
| GR44531     | <i>Bassariscus astutus</i>          | MID-14 | 1      | 7,131     | 3,462         | 10,592      | 195  |
| GR49586     | <i>Bassariscus astutus</i>          | MID-15 | 1      | 2,786     | 2,273         | 5,059       | 112  |
| AB1         | <i>Ariocarpus bravoanus</i>         | MID-16 | 1      | 553       | 856           | 1,409       | 19   |
| AF1         | <i>Ariocarpus fissuratus</i>        | MID-17 | 1      | 113       | 88            | 201         | 6    |
| AG1         | <i>Ariocarpus agavoides</i>         | MID-18 | 1      | 933       | 1,063         | 1,996       | 17   |
| AT1         | <i>Ariocarpus trigonus</i>          | MID-19 | 1      | 257       | 404           | 661         | 5    |
| AK1         | <i>Ariocarpus kotschoubeyanus</i>   | MID-20 | 1      | 687       | 768           | 1,455       | 15   |
| AM1         | <i>Astrophytum caput-medusae</i>    | MID-21 | 1      | 6,073     | 1,588         | 7,662       | 27   |
| AM2         | <i>Astrophytum caput-medusae</i>    | MID-22 | 1      | 12        | 4             | 16          | 0    |
| 121         | <i>Arabidopsis thaliana</i>         | MID-01 | 2      | 2,140     | 1,871         | 4,011       | 65   |
| BB1         | <i>Tangara guttata</i>              | MID-02 | 2      | 1,804     | 2,047         | 3,850       | 77   |
| BB2         | <i>Thraupis palmarum</i>            | MID-03 | 2      | 200       | 139           | 340         | 34   |
| BB3         | <i>Tachyphonus rufus</i>            | MID-04 | 2      | 1,897     | 2,141         | 4,038       | 3    |
| 65          | <i>Arabidopsis thaliana</i>         | MID-05 | 2      | 1,897     | 2,141         | 4,038       | 65   |
| 5B-10       | <i>Ashmunella rhyssa hyporhyssa</i> | MID-06 | 2      | 3,568     | 2,941         | 6,509       | 53   |
| 9A-3        | <i>Ashmunella rhyssa edentata</i>   | MID-07 | 2      | 5,823     | 5,769         | 11,592      | 88   |
| 8B-14       | <i>Ashmunella rhyssa edentata</i>   | MID-08 | 2      | 2,772     | 2,288         | 5,060       | 35   |
| GR33        | <i>Urocyon cinereoargenteus</i>     | MID-10 | 2      | 344       | 329           | 673         | 13   |
| GR28        | <i>Urocyon cinereoargenteus</i>     | MID-11 | 2      | 2,615     | 2,100         | 4,715       | 131  |
| GR378       | <i>Dipodomys spectabilis</i>        | MID-13 | 2      | 2,247     | 1,707         | 3,954       | 39   |
| GR571       | <i>Dipodomys spectabilis</i>        | MID-14 | 2      | 2,826     | 1,975         | 4,801       | 60   |
| GRE3771     | <i>Urocyon littoralis</i>           | MID-15 | 2      | 1,808     | 2,055         | 3,863       | 58   |
| GRP9B       | <i>Urocyon littoralis</i>           | MID-16 | 2      | 3,094     | 2,304         | 5,398       | 126  |
| 3           | <i>Lepidium meyenii</i>             | MID-17 | 2      | 7,398     | 6,654         | 14,052      | 268  |
| 37          | <i>Lepidium meyenii</i>             | MID-18 | 2      | 2,010     | 1,973         | 3,983       | 65   |

Continued on next page...

Table 1 – continued from previous page

| Accession # | Taxa                                 | MID    | Region | SSR reads | non-SSR reads | Total reads | Loci |
|-------------|--------------------------------------|--------|--------|-----------|---------------|-------------|------|
| 2A          | <i>Bouteloua eriopoda</i>            | MID-19 | 2      | 2,720     | 2,199         | 4,922       | 105  |
| 3B          | <i>Bouteloua eriopoda</i>            | MID-20 | 2      | 2,794     | 2,380         | 5,172       | 88   |
| EP155       | <i>Cryphonectria parasitica</i>      | MID-21 | 2      | 3,775     | 3,376         | 7,152       | 141  |
| EP146       | <i>Cryphonectria parasitica</i>      | MID-22 | 2      | 2,241     | 1,678         | 3,919       | 51   |
| 81          | <i>Aedes aegypti</i>                 | MID-01 | 3-4    | 6,690     | 4,841         | 11,531      | 104  |
| 122         | <i>Arabidopsis thaliana</i>          | MID-02 | 3-4    | 5,349     | 4,758         | 10,109      | 257  |
| 123         | <i>Arabidopsis thaliana</i>          | MID-03 | 3-4    | 2,655     | 8,408         | 11,063      | 55   |
| 124         | <i>Arabidopsis thaliana</i>          | MID-04 | 3-4    | 2,125     | 1,670         | 3,795       | 62   |
| 125         | <i>Arabidopsis thaliana</i>          | MID-05 | 3-4    | 63        | 125           | 188         | 3    |
| D4          | <i>Euphydryas anicia cloudcrofti</i> | MID-06 | 3-4    | 7,396     | 2,634         | 10,030      | 35   |
| D7          | <i>Euphydryas anicia cloudcrofti</i> | MID-07 | 3-4    | 7,614     | 7,809         | 15,423      | 140  |
| D4          | <i>Euphydryas anicia cloudcrofti</i> | MID-08 | 3-4    | 5,951     | 3,128         | 9,080       | 36   |
| D7          | <i>Euphydryas anicia cloudcrofti</i> | MID-10 | 3-4    | 3,039     | 3,847         | 6,886       | 39   |
| D4          | <i>Euphydryas anicia cloudcrofti</i> | MID-11 | 3-4    | 3,333     | 3,472         | 6,805       | 48   |
| D7          | <i>Euphydryas anicia cloudcrofti</i> | MID-13 | 3-4    | 7,023     | 5,124         | 12,147      | 138  |
| D4          | <i>Euphydryas anicia cloudcrofti</i> | MID-14 | 3-4    | 9,166     | 8,239         | 17,405      | 75   |
| D7          | <i>Euphydryas anicia cloudcrofti</i> | MID-15 | 3-4    | 10,988    | 14,506        | 25,494      | 180  |
| O2          | <i>Obregonia denegrii</i>            | MID-16 | 3-4    | 8         | 45            | 53          | 1    |
| C1          | <i>Euphydryas</i>                    | MID-17 | 3-4    | 16,665    | 24,914        | 41,580      | 145  |
| C2          | <i>Euphydryas</i>                    | MID-18 | 3-4    | 11,442    | 11,408        | 22,847      | 116  |
| HOP1        | <i>Euphydryas anicia eurytion</i>    | MID-19 | 3-4    | 3,831     | 5,416         | 9,247       | 47   |
| HOP2        | <i>Euphydryas anicia eurytion</i>    | MID-20 | 3-4    | 12,599    | 18,509        | 31,108      | 50   |
| HMT1        | <i>Euphydryas anicia eurytion</i>    | MID-21 | 3-4    | 145       | 697           | 842         | 10   |
| HMT2        | <i>Euphydryas anicia eurytion</i>    | MID-22 | 3-4    | 41        | 45            | 86          | 3    |

Table 2: Number of sequences decoded with MIDs (Roche TCB No. 005-2009) that have not been used for multiplexing. In this this demultiplexing run we estimated the false positives calling rate.

| MID    | Plate region | Total reads |
|--------|--------------|-------------|
| MID-23 | 1            | 7           |
| MID-24 | 1            | 51          |
| MID-25 | 1            | 7           |
| MID-26 | 1            | 5           |
| MID-27 | 1            | 16          |
| MID-28 | 1            | 6           |
| MID-29 | 1            | 33          |
| MID-30 | 1            | 34          |
| MID-31 | 1            | 6           |
| MID-32 | 1            | 15          |
| MID-33 | 1            | 141         |
| MID-34 | 1            | 1           |
| MID-35 | 1            | 111         |
| MID-36 | 1            | 8           |
| MID-37 | 1            | 23          |
| MID-38 | 1            | 10          |
| MID-39 | 1            | 25          |
| MID-40 | 1            | 30          |
| MID-41 | 1            | 16          |

Continued on next page...

**Table 2 – continued from previous page**

| <b>MID</b> | <b>Plate region</b> | <b>Total reads</b> |
|------------|---------------------|--------------------|
| MID-42     | 1                   | 12                 |
| MID-23     | 2                   | 3                  |
| MID-24     | 2                   | 2                  |
| MID-25     | 2                   | 13                 |
| MID-26     | 2                   | 12                 |
| MID-27     | 2                   | 12                 |
| MID-28     | 2                   | 20                 |
| MID-29     | 2                   | 26                 |
| MID-30     | 2                   | 22                 |
| MID-31     | 2                   | 14                 |
| MID-32     | 2                   | 13                 |
| MID-33     | 2                   | 29                 |
| MID-34     | 2                   | 6                  |
| MID-35     | 2                   | 199                |
| MID-36     | 2                   | 22                 |
| MID-37     | 2                   | 36                 |
| MID-38     | 2                   | 13                 |
| MID-39     | 2                   | 12                 |
| MID-40     | 2                   | 20                 |
| MID-41     | 2                   | 8                  |
| MID-42     | 2                   | 19                 |
| MID-23     | 3-4                 | 4                  |
| MID-24     | 3-4                 | 378                |
| MID-25     | 3-4                 | 13                 |
| MID-26     | 3-4                 | 80                 |
| MID-27     | 3-4                 | 61                 |
| MID-28     | 3-4                 | 40                 |
| MID-29     | 3-4                 | 163                |
| MID-30     | 3-4                 | 523                |
| MID-31     | 3-4                 | 20                 |
| MID-32     | 3-4                 | 30                 |
| MID-33     | 3-4                 | 69                 |
| MID-34     | 3-4                 | 24                 |
| MID-35     | 3-4                 | 337                |
| MID-36     | 3-4                 | 14                 |
| MID-37     | 3-4                 | 42                 |
| MID-38     | 3-4                 | 30                 |
| MID-39     | 3-4                 | 110                |
| MID-40     | 3-4                 | 48                 |
| MID-41     | 3-4                 | 40                 |
| MID-42     | 3-4                 | 16                 |

## 2 Genotyping experiments and PCR protocol

### 2.1 Collecting and handling biological materials

Samples of *Euphydryas anicia cloudcrofti* [1] (*Lepidoptera: Nymphalidae*) larvae were collected in 2002 from the Sacramento Mountains, Otero County, New Mexico with permits from the U.S. Forest Service. Samples were frozen in  $-80^{\circ}\text{C}$  until DNA extraction could be performed.

### 2.2 PCR protocol

DNA was extracted using a salt-out extraction protocol described by [2]. Polymerase Chain Reaction (PCR) was performed in  $20\mu\text{l}$  reaction volume using  $1\mu\text{l}$  of DNA extract diluted 1:10,  $20\text{pmol}$  concentration of primers, dNTP concentration of  $200\mu\text{M}$ , 1 unit of Platinum Taq polymerase (Invitrogen), and a  $\text{MgCl}_2$  concentration of  $1.5\text{mM}$ . The initial PCR cycling profile was  $94^{\circ}\text{C}$  for 2 min, 40 cycles of  $94^{\circ}\text{C}$  for 30s,  $58.4^{\circ}\text{C}$  for 40s,  $72^{\circ}\text{C}$  for 30s, and a final extension period of  $72^{\circ}\text{C}$  for 7 min. Initially PCR was conducted with a temperature titration to determine the proper annealing temperature under 6 temperature conditions  $45^{\circ}\text{C}$ ,  $51.3^{\circ}\text{C}$ ,  $54.6^{\circ}\text{C}$ ,  $58.4^{\circ}\text{C}$ ,  $61.7^{\circ}\text{C}$ ,  $64.3^{\circ}\text{C}$ ,  $66.1^{\circ}\text{C}$ . In the titration experiments, as discussed in Subsection 2.3, primers EC14, EC18, and EC24 showed the best results, and these products were sequenced.

### 2.3 Genotyping of *Euphydryas anicia cloudcrofti*

For the genotyping experiment primers have been ordered as shown in Table 3. Using the ordered primers the temperature gradient PCR amplifications have been accomplished as shown in Figure 1.

| Locus Name | Primer Sequence (5' – 3')                                  | SSR consensus | Annealing T <sub>m</sub> (°C) | Target SSR Size (bp) |
|------------|------------------------------------------------------------|---------------|-------------------------------|----------------------|
| EC13       | F: CCAACCTTGGTATGTGCAAG<br>R: TGTGTAAAATCACCTTATGACGAAA    | AAATG         |                               | 199                  |
| EC14       | F: AAAAACCCGACTGCGTAAAA<br>R: GTCTCAAACCTTTTGACCGGC        | ACAT          | 58.4°C                        | 188                  |
| EC15       | F: CCGATTTTCAGGACCACCTA<br>R: AAAAAGTCGTAAGGTGTTGA         | ACAT          |                               | 152                  |
| EC16       | F: GAATGCCACTCGGCATAAGT<br>R: TGTTCAAGCATTCTATATTTATTTATG  | ACACAT        |                               | 151                  |
| EC17       | F: CGTACTCACACATTCATAGCAA<br>R: AAGTGTTAGTGTTGATTGTGTGAGTG | ACACAT        |                               | 115                  |
| EC18       | F: TCAAACAGCAACAAAGGCAC<br>R: GCTGTTGCTGTTGCATCTGT         | AAC           | 58.4°C                        | 112                  |
| EC19       | F: CATCATACTATGCCGTGCCA<br>R: CAATCAAGGTTTCAGCTTGTGA       | AATGT         |                               | 196                  |
| EC20       | F: TATAGAGCGGAGGCTTTTGC<br>R: TCCTCTCAAAGATGATGGGG         | ACC           |                               | 152                  |
| EC21       | F: TCACACTGGTGAAGGAGCTG<br>R: TGAGTCCTGAGTAAATCATCCTG      | AACAGC        |                               | 149                  |
| EC22       | F: CATTGTGAGCAAACCTGCAT<br>R: TGTAGACCACATACCGGCAA         | ATC           |                               | 143                  |
| EC23       | F: TCGTGTATGAGAAAAGGGGG<br>R: ATGGTGATCAGGAAGAAGGC         | ACAT          |                               | 135                  |
| EC24       | F: TTTATTGGCAATTCCGCTTC<br>R: AGTACGCCCAACTTTCATGC         | ACACGC        | 58.4°C                        | 108                  |
| EC25       | F: CTGGGCGACTTTTGTGTTGAT<br>R: AGGAGGCCTACGTTCAACAG        | ATC           |                               | 85                   |

Table 3: Primers used



-GC-AACAGC-AGCAAC-AGC-AACAGCAACAACAACAACATCAACAACAAATACAGCAGCAGC-AGAT-GCAACAAC-AGCAGCAGATGCAACGACAACAACAGCATC-AACAACAA  
 -GC-AACAGC-AGCAAC-AGC-AACAGCAACAACAACAACATCAACAACAAATACAGCAGCAGC-AGATAGCAACAAC-AGCAGCAGATGCAACAACAACAACAGCATC-AACAACAA  
 -GC-AACAGC-AGCAAC-AGC-AACAGCAACAACAACAACATCAACAACAAATACAGCAGCAGCAAGAT-GCAACAAC-AGCAGCAGATGCAACAACAACAACAGCATC-AACAACAA  
 -GC-AACAGC-AGCAAC-AGC-AACAGCAACAACAACAACATCAACAACAAATACGGCAGCAGC-AGAT-GCAACAAC-AGCAGCAGATGCAACAACAACAACAGCATC-AAGGACAA  
 -GC-AACAGC-AGCAAC-AGC-AACAGCAACAATAACAACAACATCAACAACAAATACAGCAGCAGC-AGAT-GCAACAAC-AGCAGCAGATGCAACAACAACAACAGCATC-AACAACAA  
 -GC-AACAGC-AGCAACAAGC-AACAGCAACAACAACAACATCAACAACAAATACAGCAGCAGC-AGAT-GCAACAACAAGCAGCAGATGCAACAACAACAACAGCATC-AACAAC-A  
 -GC-AACAGCTAGCAAC-AGC-AACAGCAACAACAACAACATCAACAACAAATACAGCAGCAGC-AGAT-GCAACAAC-AGCAGCAGATGCAACAACAACAACAGCATC-AACAACAA  
 -GC-AGCAGC-AGCAAC-AGC-AACAGCAACAACAACAACATCAACAACAAATACAGCAGCAGC-AGAT-GCAACAAC-AGCAGCAGATGCAACAACAACAACAGCATC-AACAACAA  
 -GCAACAGC-AGCAAC-AGC-AACAGCAACAACAACAACATCAACAACAAATACAGCAGCAGC-AGAT-GCAACAAC-AGCAGCAGATGCAACAACAACAACAGCATC-AACAACAA  
 AGC-AACAGC-AGCAAC-AGC-AACAGCAACAACAACAACATCAACAACAAATACAGCAGCAGC-AGAT-GCAACAAC-AGCAGCAGATGCAACAACAACAACAGCATC-AACAAC-A  
 GAC-AACAGCAGACAAC-AGC-AACAGCAACAACAACAACATCAACAACAAATACAGCAGCAGC-AGAT-GCAACAAC-AGCAGCAGATGCAACAACAACAACAGCATC-AACAACAA

The sequences from locus specific amplifications have been aligned with the 3beb8c97-23da-c2d5-94dc-e7ba7006086d locus sequence (EC18).

D6\_EC18 -----tTCAAACAGCAACAAAGGCAGCAGCGTTGCTCAGACAACATCA  
 F1\_EC18 -----tTCAAACAGCAACAAAGGCAGCAGCGTTGCTCAGACAACATCA  
 EC18\_Allele\_1 -----tcAACAGCAACAAAGGCAGCAGCGTTGCTCAGACAACATCA  
 EC18\_Allele\_2 -----ATCAAACAGCAACAAAGGCAGCAGCGTTGCTCAGACAACATCA  
 3beb8c97-23da-c2d5-94dc-e7ba7006086d gatgagtcctgagtaaATCAAACAGCAACAAAGGCAGCAGCGTTGCTCAGACAACATCA

D6\_EC18 GATGCAGtTGCAACAGCAGCAACAGCAACAGCAACAACAACAACATCAgCagatgct  
 F1\_EC18 GATGCAGtTGCAACAGCAGCAACAGCAACAGCAACAACAACAACATCAgCagatgct  
 EC18\_Allele\_1 GATGCAGCTGCAACAGCAGCAACAGCAACAGCAACAACAACAACATCAACAACAAAT  
 EC18\_Allele\_2 GATGCAGCTGCAACAGCAGCAACAGCAACAG---CAACAACAACAACATCAACAACAAAT  
 3beb8c97-23da-c2d5-94dc-e7ba7006086d GATGCAGCTGCAACAGCAGCAACAGCAACAGCAACAACAACAACATCAACAACAAAT

D6\_EC18 ACAGCAGCAGCAGATGCAACAACAGCAGCAGATGCAAC-----  
 F1\_EC18 ACAGCAGCAGCAGATGCAACAACAGCAGCAGATGCAAC-----  
 EC18\_Allele\_1 ACAGCAGCAGCAGATGCAACAACAGCAGCAGATGCAACAACAACAACAGCATCAACAACA  
 EC18\_Allele\_2 ACAGCAGCAGCAGAcGCAACAACAGCAGCAGATGCAACAACAACAACAGCATCAACAACA  
 3beb8c97-23da-c2d5-94dc-e7ba7006086d ACAGCAGCAGCAGATGCAACAACAGCAGCAGATGCAACAACAACAACAGCATCAACAACA

D6\_EC18 -----  
 F1\_EC18 -----  
 EC18\_Allele\_1 AATACAGATGCAACAGCAACAGCAGCAGCAGCAACAACAGATGCGGCAGAGTCGACAACA  
 EC18\_Allele\_2 AATACAGATGCAACAGCAACAGCAGCAGCAGCAACAACAGATGCGGCAGAGTCGACAACA  
 3beb8c97-23da-c2d5-94dc-e7ba7006086d AATACAGATGCAACAGCAACAGCAGCAGCAGCAACAACAGATGCGGCAGAGTCGACAACA

D6\_EC18 -----  
 F1\_EC18 -----  
 EC18\_Allele\_1 ACAGAcACAGTTCGATaATCAAGTAGAGATACAAGTGTTCtcaAACAAGTTCGGAT  
 EC18\_Allele\_2 ACAGAgCAGTTCGAT-ATCAAGTAGAGATACAAGTGTTCtCAACAAGTTCGGAT  
 3beb8c97-23da-c2d5-94dc-e7ba7006086d ACAGAcACAGTTCGAT-ATCAAGTAGAGATACAAGTGTTCtCAACAAGTTCGGAT

D6\_EC18 -----  
 F1\_EC18 -----  
 EC18\_Allele\_1 GTTCTGGGTAAGA-TTATAAATTAGC-TTTATAGTTCGGTATACaAAAGTGTGCCATCAG  
 EC18\_Allele\_2 GTTCTGGGTAAGATTTATAAATTAGCTTTTATAGTTCGGTATAC-AAAGTGTGCCATCAG  
 3beb8c97-23da-c2d5-94dc-e7ba7006086d GTTCTGGGTAAGATTTATAAATTAGCTTTTATAGTTCGGTATAC-AAAGTGTGCCATCAG

D6\_EC18 -----  
 F1\_EC18 -----





D6\_EC24 **nn**ACTAAATAC-TTTTTTCTTACCA---AACACCCACA**a**-----ACGCACACGCACA  
EC24\_Allele\_1 **A**CACTAAATAC-TTTTTTCTTACCA**t**TAAACACCCACAC**a**ACGCACACGCACACGCACA  
EC24\_Allele\_2 **A**CACTAAATAC-TTTTTTCTTACCA-TAAACACCCACAC-ACGCACACGCACACGCACA  
b13d51ea-431f-f31a-6d49-b232cef90edb **A**CACTAAATAC-TTTTTTCTTACCA-TAAACACCCACAC-----ACGCACACGCACA  
EC24\_Allele\_3 **A**CACTAAATAC**t**TTTTTTCTTACCA-TAAACACCCACAC-----ACGCACACGCACA

D6\_EC24 **CGCACACGCACACGCACACGCACACGCACACGCACACGCACACGCACACGCACACGCACA**  
EC24\_Allele\_1 **CGCACACGCACACGCACACGCACACGCACACGCACACGCACACGCACACGCACACGCACA**  
EC24\_Allele\_2 **CGCACACGCACACGCACACGCACACGCACACGCACACGCACACGCACACGCACACGCACA**  
b13d51ea-431f-f31a-6d49-b232cef90edb **CGCACACGCACACGCACACGCACACGCACACGCACACGCACACGCACACGCACACGCACA**  
EC24\_Allele\_3 **CGCACACGCACACGCACACGCACACGCACACGCACACGCACACGCACACGCACACGCACA**

D6\_EC24 **CAAACACGTACACAAACACGTACACGCACACGTCTGT-GTCTAGAAAG**a**G-TTACTTTAC**  
EC24\_Allele\_1 **CAAACACGTACACAAACACGTACACGCACACGTCTGT**a**GTCTAGAAAGTG-TTACTTTAC**  
EC24\_Allele\_2 **CAAACACGTACACAAACACGTACACGCACACGTCTGT-GTCTAGAAAGTG-TTACTTTAC**  
b13d51ea-431f-f31a-6d49-b232cef90edb **CAAACACGTACACAAACACGTACACGCACACGTCTGT-GTCTAGAAAGTGTTTACTTTAC**  
EC24\_Allele\_3 **CAAACACGTACACAAACACGTACACGCACACGTCTGT-GTCTAGAAAGTGTTTACTTTAC**

D6\_EC24 **AAATACCGGATGTCACTCTATATATTA**t**aCAG**a**A-TCAT**t**AATAT**a**tn**a**TGTAC**n**TATAT**  
EC24\_Allele\_1 **AAATACCGGATGTCACTCTATATATTACTCAGGACTCATC-----**  
EC24\_Allele\_2 **AAATACCGGATGTCACTCTATATATTACTCAGGACTCATC-----**  
b13d51ea-431f-f31a-6d49-b232cef90edb **AAATACCGGATGTCACTCTATATATTACTCAGGACTCATCAATAT---ATGTAC**g**TATAT**  
EC24\_Allele\_3 **-AAATACCGGATGTCACTCTATATATTACTCAGGACTCATC-----**

D6\_EC24 **GTCGC**n**GAT**n**ATAT**Gn**TGAGTATTTATAT**n**-n**AATGTn**AATAAAATTAGGTTTTGCTTTT**  
EC24\_Allele\_1 **-----**  
EC24\_Allele\_2 **-----**  
b13d51ea-431f-f31a-6d49-b232cef90edb **GTCGC**t**GAT**g**ATAT**Gc**TGAGTATTTATAT**gat**AATGT**a**AATAAAATTAGGTTTTGCTTTT**  
EC24\_Allele\_3 **-----**

D6\_EC24 **G**c**TCTTAGCATAAAATTTTAA-TTACA**n**ATGTAG**Gn**nt-**  
EC24\_Allele\_1 **-----**  
EC24\_Allele\_2 **-----**  
b13d51ea-431f-f31a-6d49-b232cef90edb **G**g**TCTTAGCATAAAATTTTAA**t**TTACA**a**tATGTAG**a**Gtaca**  
EC24\_Allele\_3 **-----**

## References

- [1] C.D. Ferris and R.W. Holland. Two new subspecies of *Occidryas anicia* (doubleday) from New Mexico. In *Bulletin fo the Allyn Museum No. 57*. Allyn Museum of Entomology, Sarasota, Florida, 1980.
- [2] J. Sambrook and D.W. Russell. *Molecular Cloning, A Laboratory Manual*. Cold Spring Harbor Laboratory, 2001.
